# Supplementary material
Source: Springer Nature journal article supplement (https://www.springermedizin.de/resource/supplementary/13102_2011_97_MOESM10_ESM.pdf/9667820)

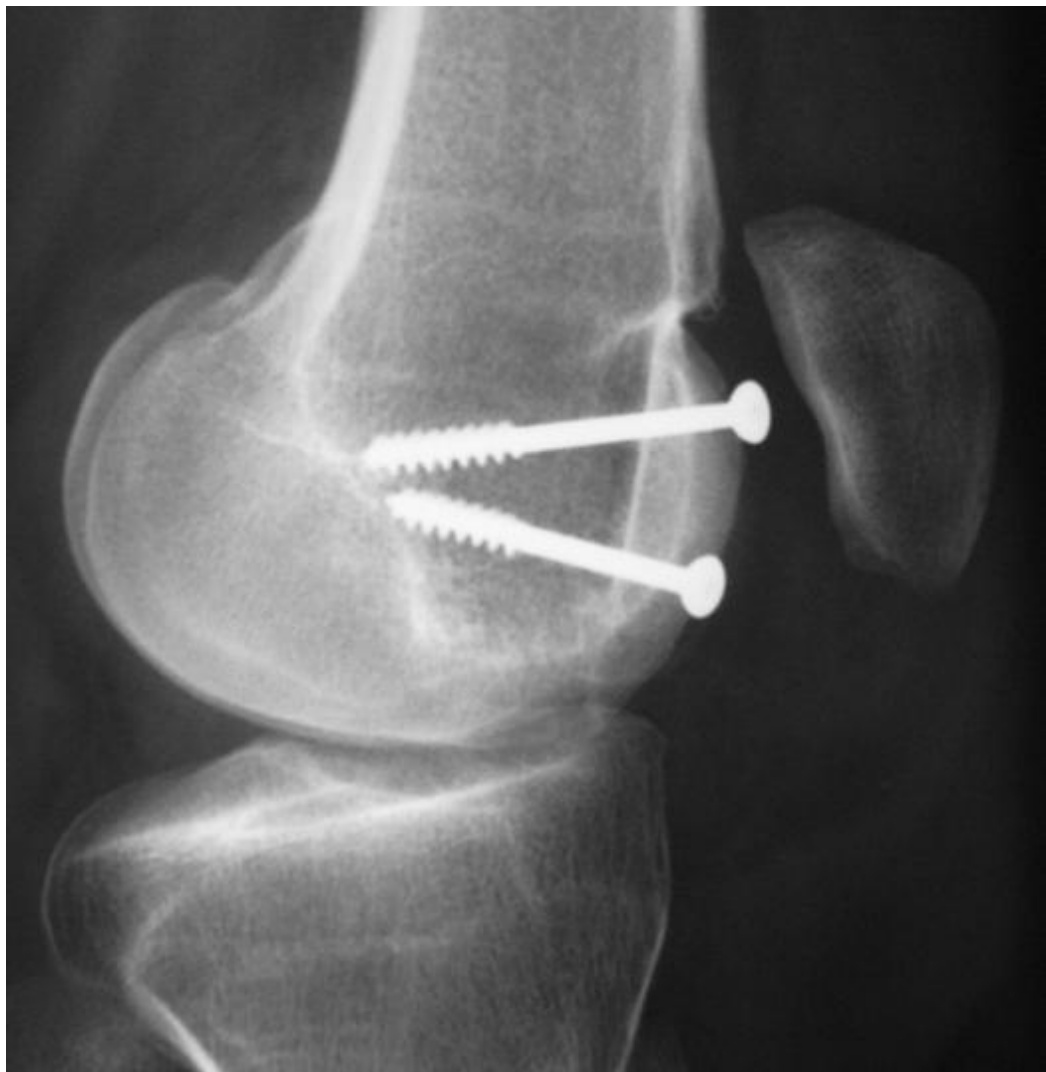

(a)

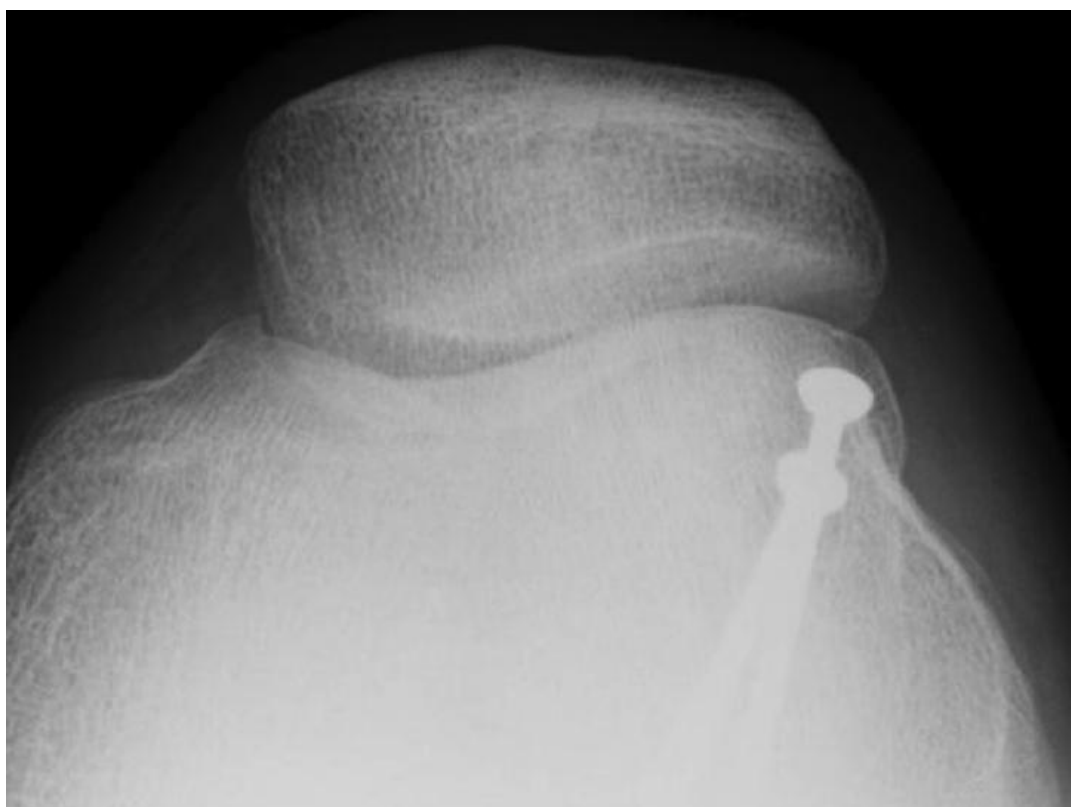

(b)

Supplement: MOESM10 [file 9667820]
